# Supplementary material for: A Paper-Based Photoelectrochemical Sensing Platform Based on In Situ Grown ZnO/ZnIn2S4 Heterojunctions onto Paper Fibers for Sensitively Detecting AFP
Source: MDPI journal article supplement (doi:10.3390/bios12100818), 2022-10-02
Supplement: s1 [file s1]

---

## Supporting Information

**A paper-based photoelectrochemical sensing platform based on in situ grown ZnO/ZnIn<sub>2</sub>S<sub>4</sub> heterojunctions onto paper fibers for sensitively detecting AFP**

**Jiali Huang <sup>1,†</sup>, Xu Li <sup>1,†</sup>, Mingzhen Xiu <sup>2</sup>, Kang Huang <sup>2</sup>, Kang Cui <sup>1,2,\*</sup>, Jing Zhang <sup>1</sup>, Shiji Hao <sup>4</sup>, Shenguang Ge <sup>1,3,\*</sup>, Jinghua Yu <sup>1</sup>, Yizhong Huang<sup>2,\*</sup>**

<sup>1</sup> School of Chemistry and Chemical Engineering, University of Jinan, Jinan 250022

<sup>2</sup> School of Materials Science and Engineering, Nanyang Technological University, Singapore 639798, Singapore

<sup>3</sup> Institute for Advanced Interdisciplinary Research, University of Jinan, Jinan 250022, P. R. China

<sup>4</sup> School of Materials Science & Engineering, Dongguan University of Technology, Guangdong 523808, P. R. China

\* Correspondence: chm\_cuik@ujn.edu.cn (K. C.); chm\_gesg@163.com (S. G.); yzhuang@ntu.edu.sg (Y. H.);

† These authors contributed equally to this work.

---

# Content

|                                                                                                                                                                                                |          |
|------------------------------------------------------------------------------------------------------------------------------------------------------------------------------------------------|----------|
| <b>Preparation of Au nanoparticle modified paper working electrode (Au-PWE)....</b>                                                                                                            | <b>1</b> |
| <b>Modification process of the working electrode .....</b>                                                                                                                                     | <b>1</b> |
| <b>Table S1</b> Comparison of other PEC-based AFP biosensors .....                                                                                                                             | <b>2</b> |
| <b>Table S2</b> Comparison of methods for the detection of AFP .....                                                                                                                           | <b>2</b> |
| <b>Figure S1.</b> Wax-patterns of the $\mu$ PAD on a paper sheet (A4). (A): before baking; (B): after baking. ....                                                                             | <b>3</b> |
| <b>Figure S2.</b> Printing of electrode of the $\mu$ PAD on a paper sheet (A4). (A): The side of the A4 paper that is printed with carbon electrode; (B): The reverse side of Figure S2A. .... | <b>3</b> |
| <b>Figure S3.</b> The physical picture of modification and detection of $\mu$ PAD.....                                                                                                         | <b>4</b> |
| <b>Figure S4.</b> Energy-dispersive spectrum (EDS) spectrum of ZnO/ZnIn <sub>2</sub> S <sub>4</sub> .....                                                                                      | <b>4</b> |
| <b>Figure S5.</b> XPS spectra of ZnO/ZnIn <sub>2</sub> S <sub>4</sub> wide scan.....                                                                                                           | <b>5</b> |
| <b>Figure S6.</b> Photocurrent responds of ZnO, ZnIn <sub>2</sub> S <sub>4</sub> and ZnO/ZnIn <sub>2</sub> S <sub>4</sub> .....                                                                | <b>5</b> |
| <b>Figure S7.</b> Stability of the proposed $\mu$ PAD for different periods of storage: 0 days, 4 days, 8 days, 12 days, 16 days, and 24 days ( $C_{AFP} = 0.1 \text{ ng mL}^{-1}$ ).....      | <b>5</b> |
| <b>References.....</b>                                                                                                                                                                         | <b>6</b> |

---

## **Preparation of Au nanoparticle modified paper working electrode (Au-PWE)**

The Au/paper substrate of  $\mu$ PAD was obtained by growing Au NPs layer on the cellulose fibers. Herein, 80 mL of ultrapure water was put into a round-bottom flask and heated it to 90 °C, and 0.8 ml of 1% H<sub>2</sub>AuCl<sub>4</sub> solution was dripped to the prepared solution and then heated to 96 °C for 1 min. Next, 2.8 ml of 1% trisodium citrate was added and stirred for 20 min. Finally, the above solution was stirred and cooled to receive a gold seed solution. After that, 80  $\mu$ L of hydroxylamine hydrochloride and gold seed solution (volume ratio 1:1) was dropped on the surface of Au/paper substrate each time and dried at air. After repeated dripping five times, it was thoroughly washed with ultrapure water and dried at 60 °C. The Au-PWE was prepared successfully.

## **Modification process of the working electrode**

Firstly, chitosan solution (0.1 wt.%, 20  $\mu$ L) was dropped on the surface of photoelectrode and left to dry at 4 °C for 24 h, followed by washing with 0.01 M NaOH and ultrapure water. After that, glutaraldehyde solution (5 wt.%, 25  $\mu$ L) was spread onto the photoelectrode, keeping for 35 min and washed thoroughly with ultrapure water. The antibody solution (100  $\mu$ g/mL, 30  $\mu$ L) was dropped onto the activated photoelectrode. After being incubated at room temperature for 24 h, the activated photoelectrode was washed with PBS. After that, 25  $\mu$ L of 0.2% bovine serum albumin (BSA) solution dissolved by PBS (0.1 mol L<sup>-1</sup>, pH 6.6) was added on the antibody modified photoelectrode for 1 h at 4 °C to block non-specific binding sites. Finally, 30  $\mu$ L antigen of AFP with different concentration were added onto the photoelectrode and incubated at 4 °C for 40 min, followed by washing thoroughly with PBS. Then, the signals of photocurrent were measured on the CHI 660C electrochemical working station in PBS solution (0.1 mol L<sup>-1</sup>, pH 6.6) dissolved 0.1 M ascorbic acid. During the PEC signal measurement procedure, a PLS-SXE 300 xenon lamp (500 W) was utilized as the irradiation source, which was switched on and off every 10 s and the applied potential was 0.4 V.

**Table S1** Comparison of other PEC-based AFP biosensors

| Materials                                            | Detection range<br>(ng mL <sup>-1</sup> ) | LOD<br>(ng mL <sup>-1</sup> ) | Ref.      |
|------------------------------------------------------|-------------------------------------------|-------------------------------|-----------|
| $\beta$ -In <sub>2</sub> S <sub>3</sub> @carbon dots | 0.5-50                                    | 0.0379                        | [1]       |
| graded oxygen-doped CdS                              | 0.2-100                                   | 0.0784                        | [2]       |
| MoS <sub>2</sub> /Au/GaN                             | 1.0-150                                   | 0.3                           | [3]       |
| RGO/dimethyldioctadecylammonium/ZnO                  | 0.05-100                                  | 0.05                          | [4]       |
| ZnO/ZnIn <sub>2</sub> S <sub>4</sub>                 | 0.1-100                                   | 0.03                          | This work |

**Table S2** Comparison of methods for the detection of AFP

| Analytical method                | Detection range<br>(ng mL <sup>-1</sup> ) | LOD<br>(ng mL <sup>-1</sup> ) | Ref.      |
|----------------------------------|-------------------------------------------|-------------------------------|-----------|
| Fluorescence<br>immunoassay      | 1-80                                      | 0.45                          | [5]       |
| Electrochemical<br>immunoassay   | 0.5-50                                    | 0.1                           | [6]       |
| Chemiluminescent<br>immunosensor | 5-70                                      | 2.5                           | [7]       |
| PEC<br>immunosensor              | 0.1-150                                   | 0.1                           | [8]       |
| PEC<br>immunosensor              | 0.1-100                                   | 0.03                          | This work |

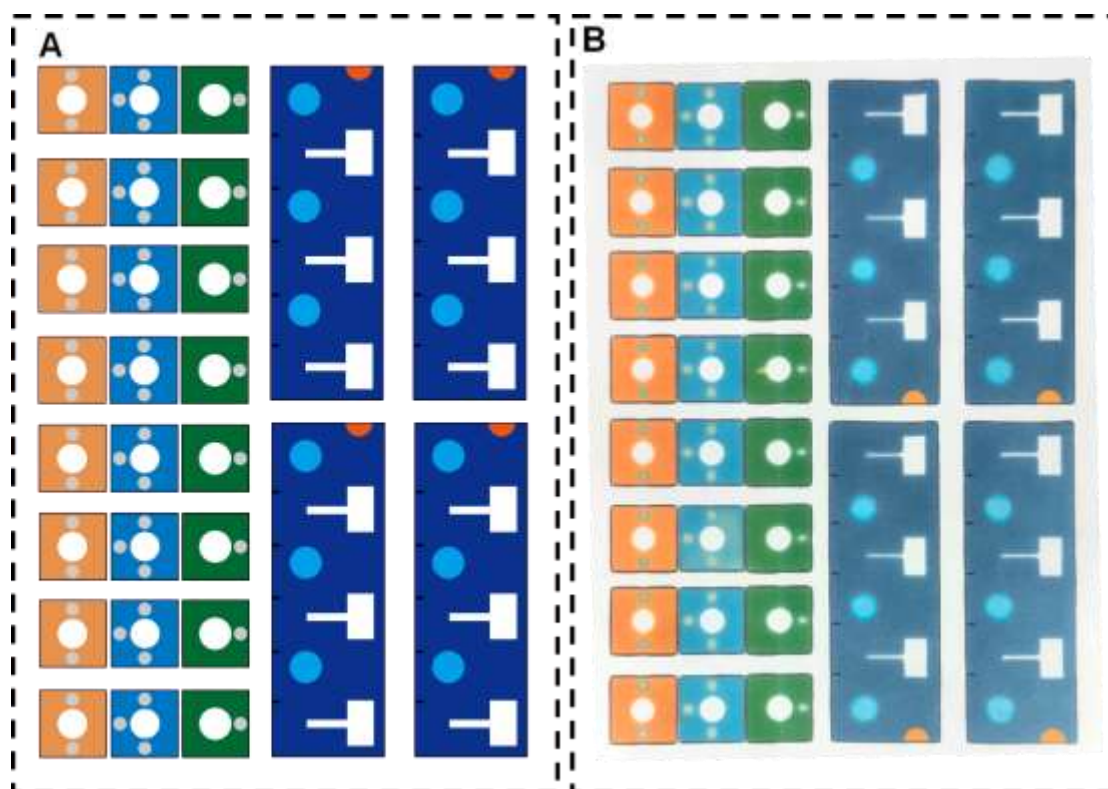

**Figure S1.** Wax-patterns of the  $\mu$ PAD on a paper sheet (A4). (A): before baking; (B): after baking.

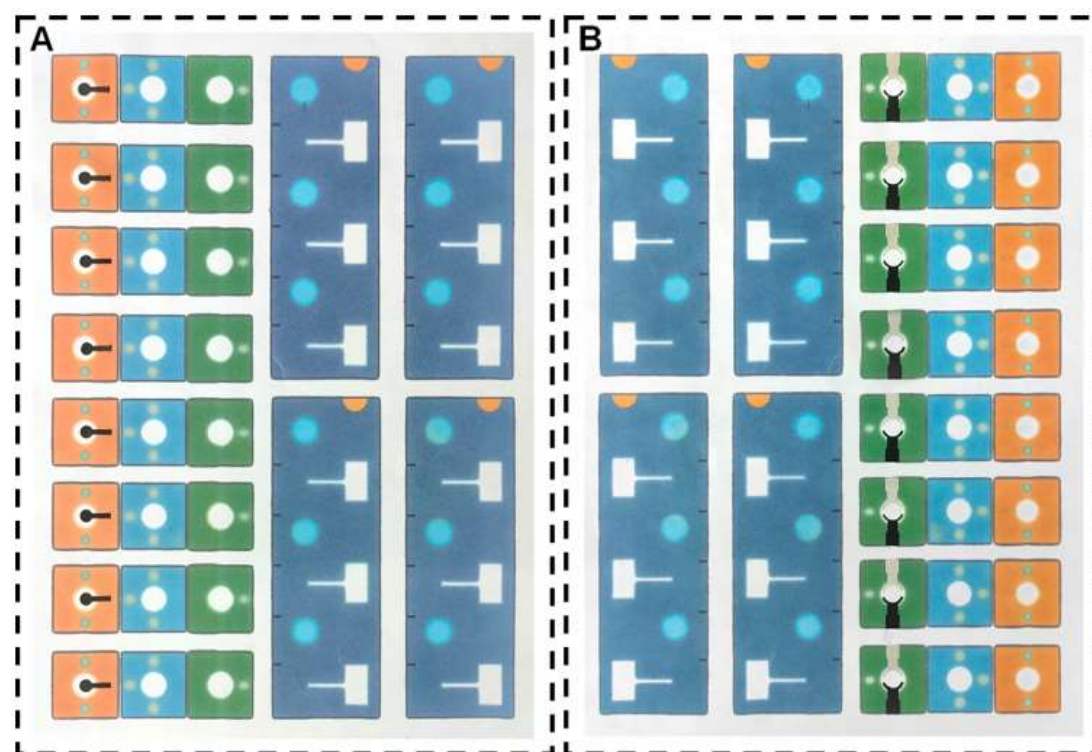

**Figure S2.** Printing of electrode of the  $\mu$ PAD on a paper sheet (A4). (A): The side of the A4 paper that is printed with carbon electrode; (B): The reverse side of Figure S2A.

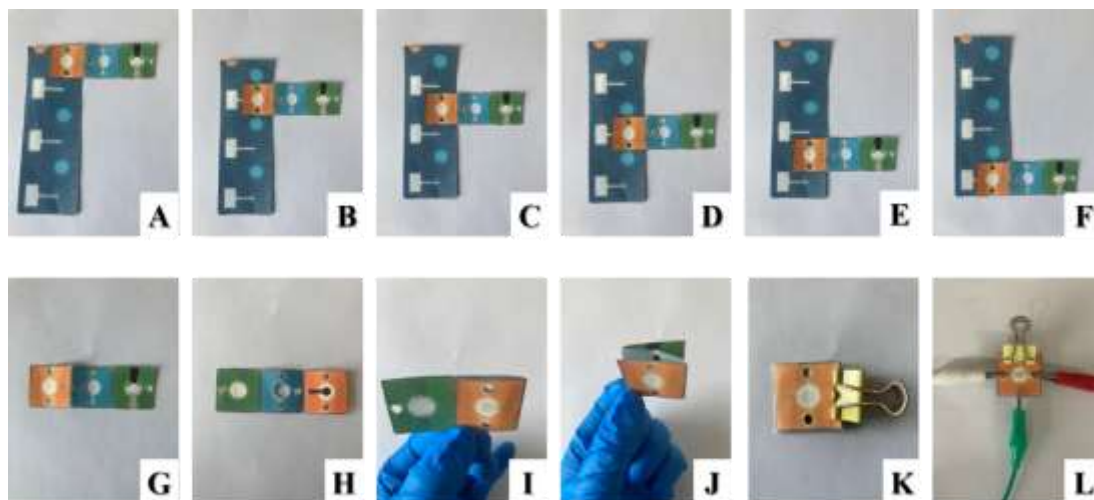

**Figure S3.** The physical picture of modification and detection of  $\mu$ PAD. (A), (C), and (E): The  $\mu$ PAD during the process of electrode modification; (B), (D), and (F): The washing process of the detection tab; (G) and (H): Unfolded  $\mu$ PAD; (I) and (J): The folding process of the  $\mu$ PAD; (K) and (L): The  $\mu$ PAD fold state during the process of PEC.

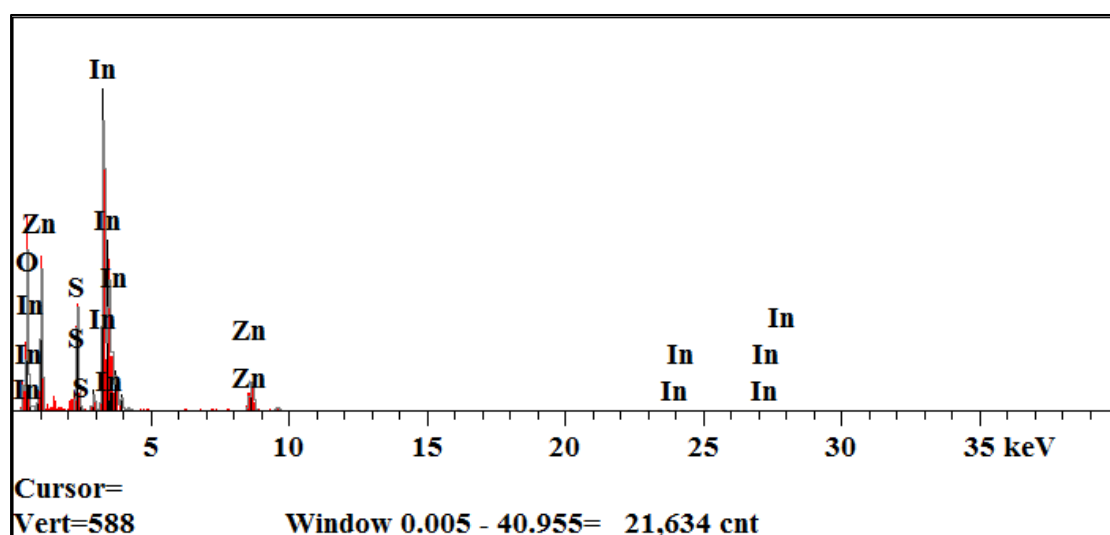

**Figure S4.** Energy-dispersive spectrum (EDS) spectrum of  $\text{ZnO}/\text{ZnIn}_2\text{S}_4$ .

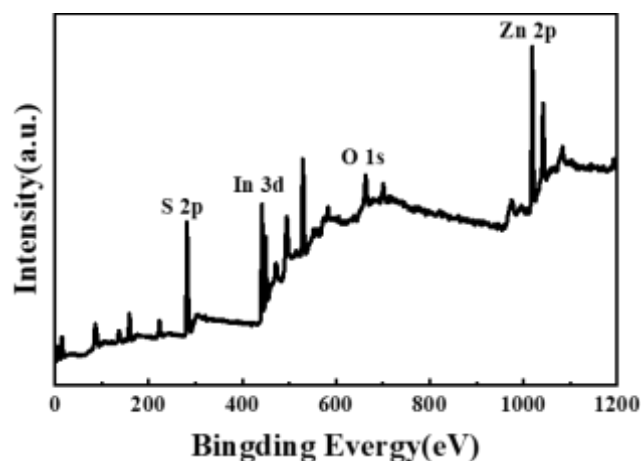

**Figure S5.** XPS spectra of ZnO/ZnIn<sub>2</sub>S<sub>4</sub> wide scan.

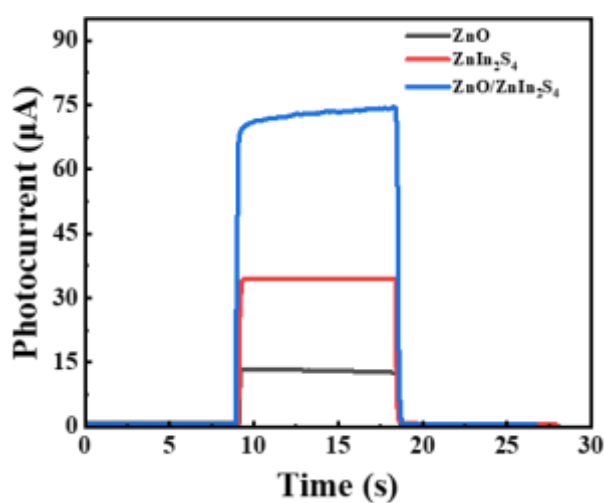

**Figure S6.** Photocurrent responds of ZnO, ZnIn<sub>2</sub>S<sub>4</sub> and ZnO/ZnIn<sub>2</sub>S<sub>4</sub>. The PEC measurement was performed in the PBS (0.1 M, pH 6.6) containing 0.1 M AA, and the applied potential was 0.4 V.

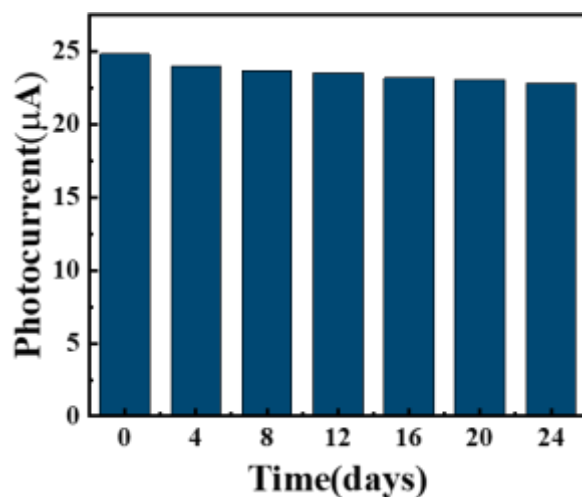

**Figure S7.** Stability of the proposed  $\mu$ PAD for different periods of storage: 0 days, 4 days, 8 days, 12 days, 16 days, and 24 days ( $C_{AFP} = 0.1 \text{ ng mL}^{-1}$ ). The PEC measurement was performed in the PBS (0.1 M, pH 6.6) containing 0.1 M AA, and the applied potential was 0.4 V.

---

## References

1. Yu, Z., Huang, L., Chen, J., Tang, Y., Xia, B. and Tang, D., Full-Spectrum Responsive Photoelectrochemical Immunoassay Based on B-In<sub>2</sub>S<sub>3</sub>@Carbon Dot Nanoflowers. *Electrochim. Acta* **2020**, 332, 135473.
2. Yu, Z., Huang, L., Chen, J., Li, M. and Tang, D., Graded Oxygen-Doped CdS Electrode for Portable Photoelectrochemical Immunoassay of Alpha-Fetoprotein Coupling with a Digital Multimeter Readout. *Sens. Actuators B Chem.* **2021**, 343, 130136.
3. Hu, D., Cui, H., Wang, X., Luo, F., Qiu, B., Cai, W., Huang, H., Wang, J. and Lin, Z., Highly Sensitive and Selective Photoelectrochemical Aptasensors for Cancer Biomarkers Based on MoS<sub>2</sub>/Au/GaN Photoelectrodes. *Anal. Chem.* **2021**, 93, 7341-7347.
4. Wu, Y., Su, H., Yang, J., Wang, Z., Li, D., Sun, H., Guo, X. and Yin, S., Photoelectrochemical Immunosensor for Sensitive Detection of Alpha-Fetoprotein Based on a Graphene Honeycomb Film. *J. Colloid Interface Sci.* **2020**, 580, 583-591.
5. Wang, Y., Chen, L., Liang, M., Xu, H., Tang, S., Yang, H. and Song, H., Sensitive fluorescence immunoassay of alpha-fetoprotein through copper ions modulated growth of quantum dots in-situ. *Sens. Actuators B Chem.* **2017**, 247, 408-413.
6. Kong, F., Xu, B., Du, Y., Xu, J. and Chen, H., A branched electrode based electrochemical platform: towards new label-free and reagentless simultaneous detection of two biomarkers. *Chem. Commun.* **2013**, 49, 1052-1054.
7. Huang, X. and Ren, J. Gold nanoparticles based chemiluminescent resonance energy transfer for immunoassay of alpha fetoprotein cancer marker. *Anal. Chim. Acta.* **2011**, 686, 115-120.
8. Liu, X., Song, X., Dong, Z., Meng, X., Chen, Y., Yang, L., Photonic crystal fiber-based immunosensor for high-performance detection of alpha fetoprotein. *Biosens. Bioelectron.* **2017**, 91, 431-435.
